# Supplementary material for: Updating the 97% identity threshold for 16S ribosomal RNA OTUs
Source: Oxford University Press journal article supplement (doi:10.1093/bioinformatics/bty113), 2018-02-27
Supplement: bioinformatics_34_14_2371_s4.zip [file bioinformatics_34_14_2371_s4.zip]

Supplementary data is here:

[https://drive5.com/opti\\_paper/supp\\_data.tar.gz](https://drive5.com/opti_paper/supp_data.tar.gz)

I posted the data on my web site because I was unable to upload a file in .tar.gz as supplementary data in the online submission system. Should the paper be accepted, I will resolve the problem or post the code and data in a public repository such as github.
